# Supplementary material for: TNIK signaling imprints CD8+ T cell memory formation early after priming
Source: PubMed Central journal article supplement (PMC7118140; doi:10.1038/s41467-020-15413-7), 2020-04-02
Supplement: 41467_2020_15413_MOESM3_ESM.pdf [file 41467_2020_15413_MOESM3_ESM.pdf]

## **Description of Additional Supplementary Files**

**Supplementary Data 1** | Differentially expressed genes between WT and KO p14 CD8<sup>+</sup> T cells 6 days p.i. ( $p$  adj <0.05 and fold differences  $\geq$  1.5), Related to Fig. 4

**Supplementary Data 2** | Differentially expressed genes between WT and KO p14 CD8<sup>+</sup> T cells 80 days p.i. ( $p$  adj <0.05 and fold differences  $\geq$  1.5), Related to Fig. 5

**Supplementary Data 3** | Images of representative dividing cells after *in vitro* activation, Related to Fig. 7
